# Supplementary material
Source: PubMed Central journal article supplement (PMC7325426)

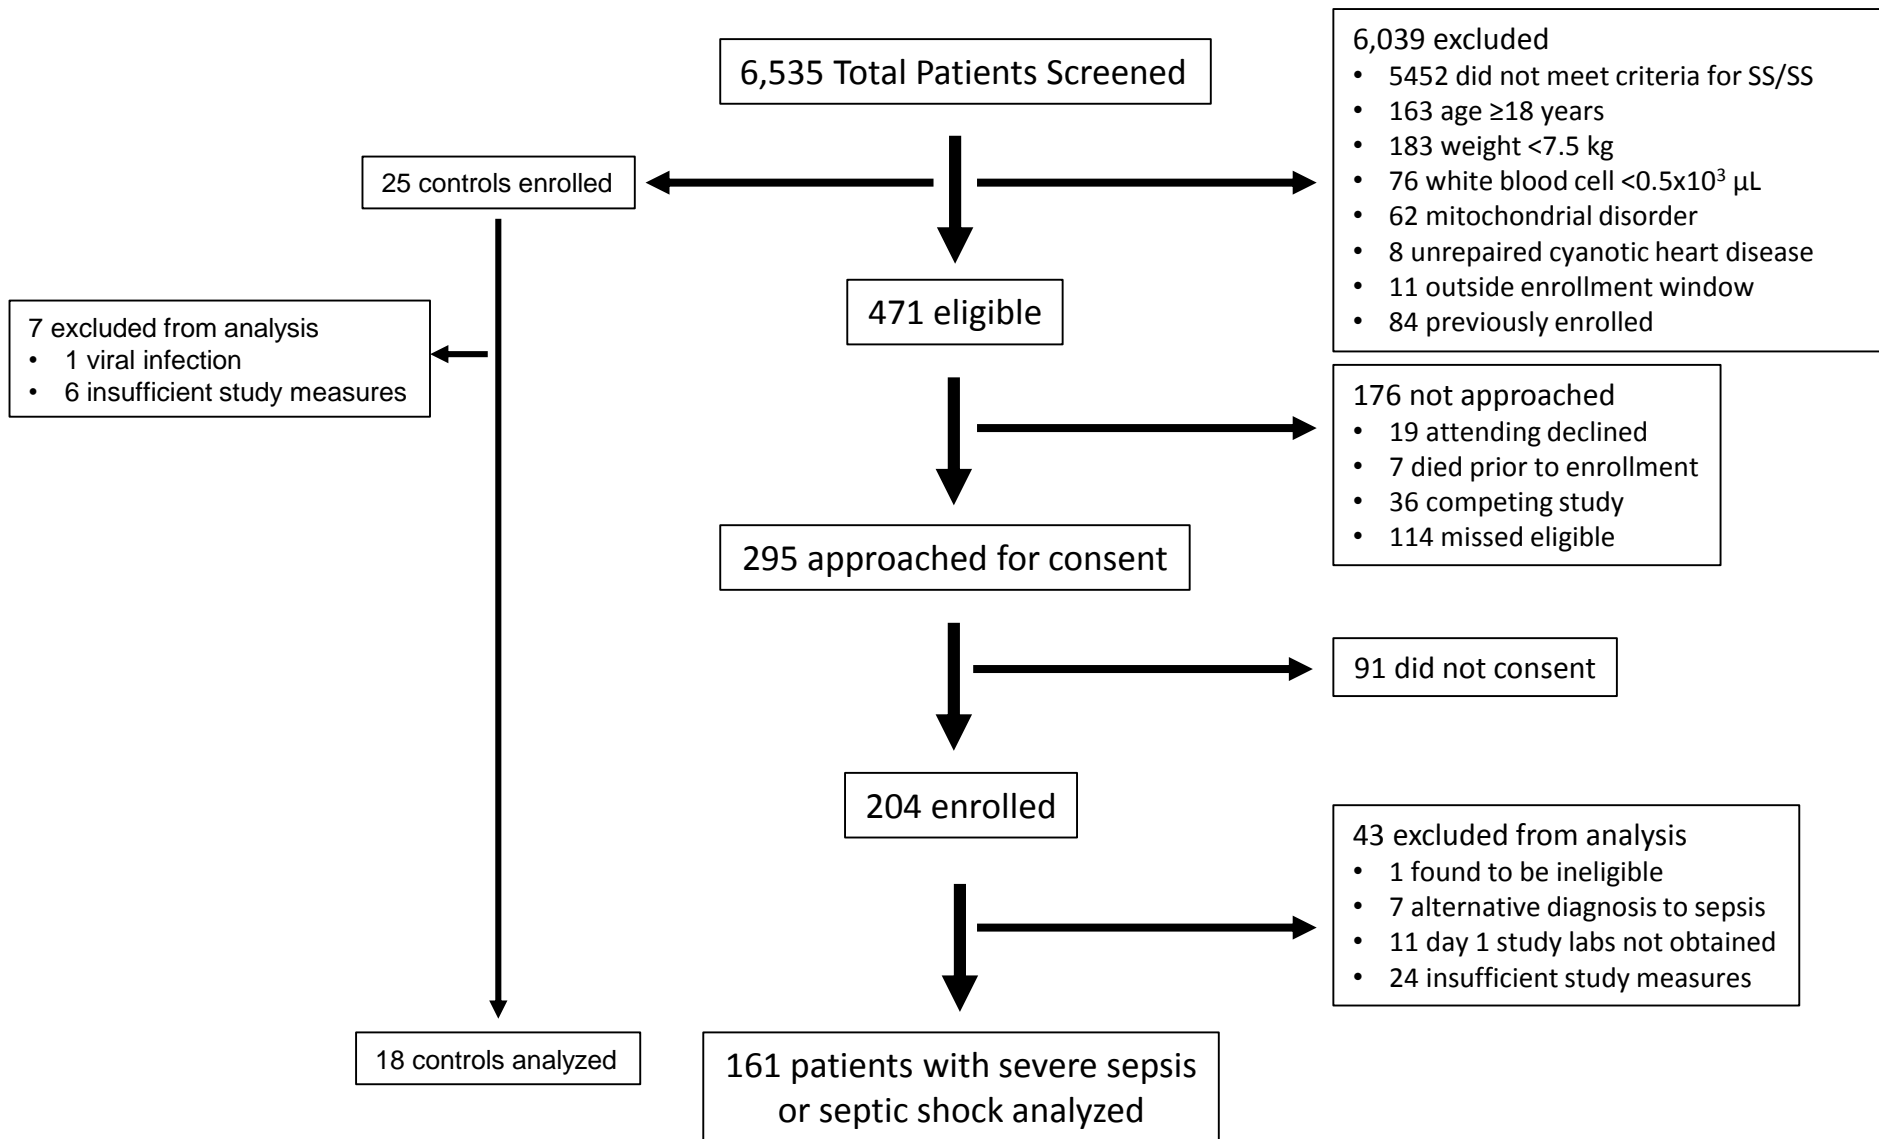

Supplement: NIHMS1592589-supplement-SDC_1.pdf [file NIHMS1592589-supplement-SDC_1.pdf]

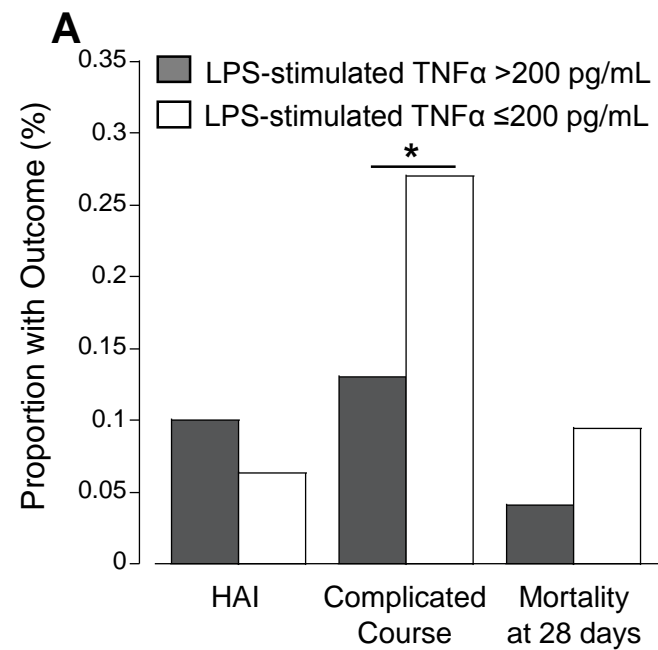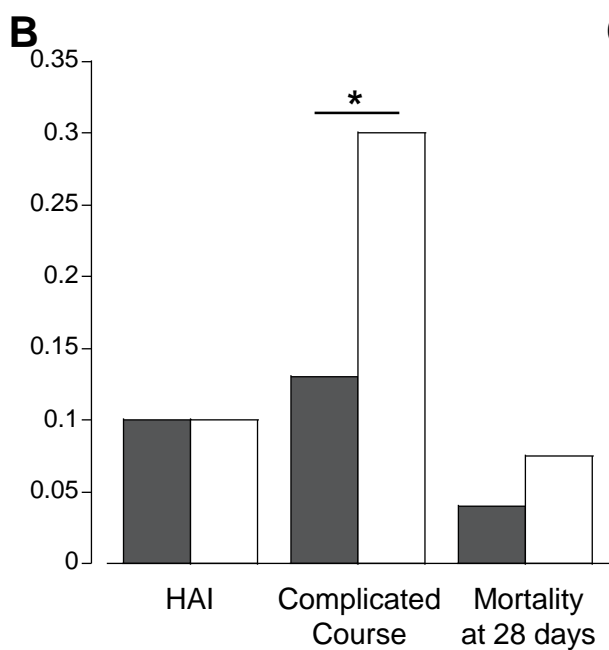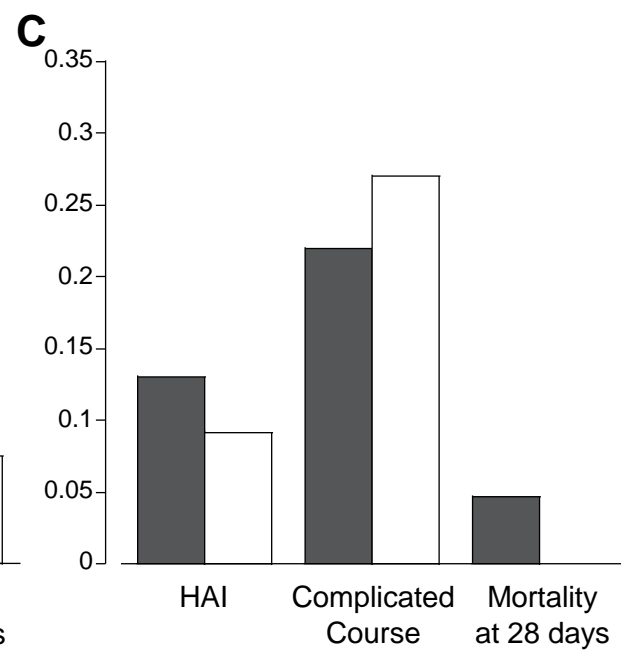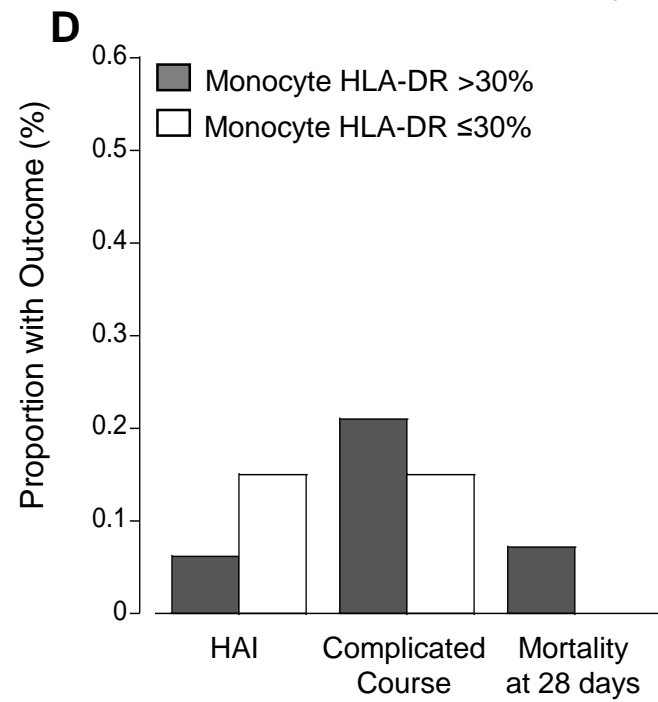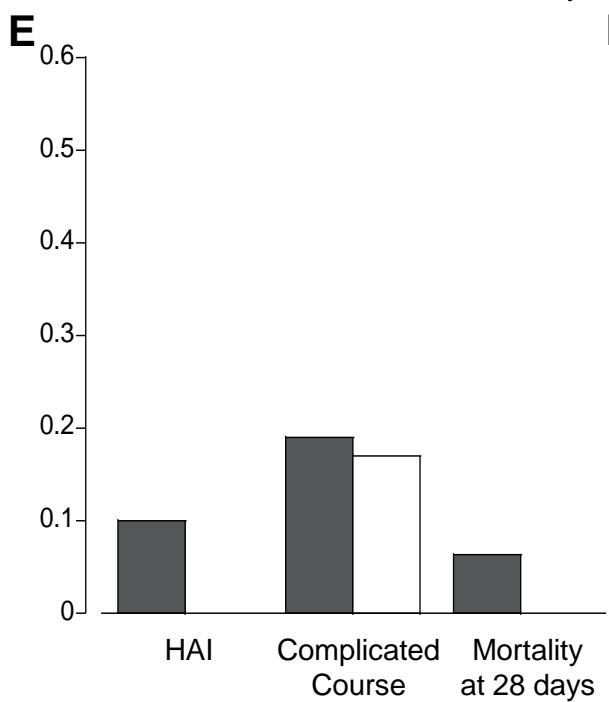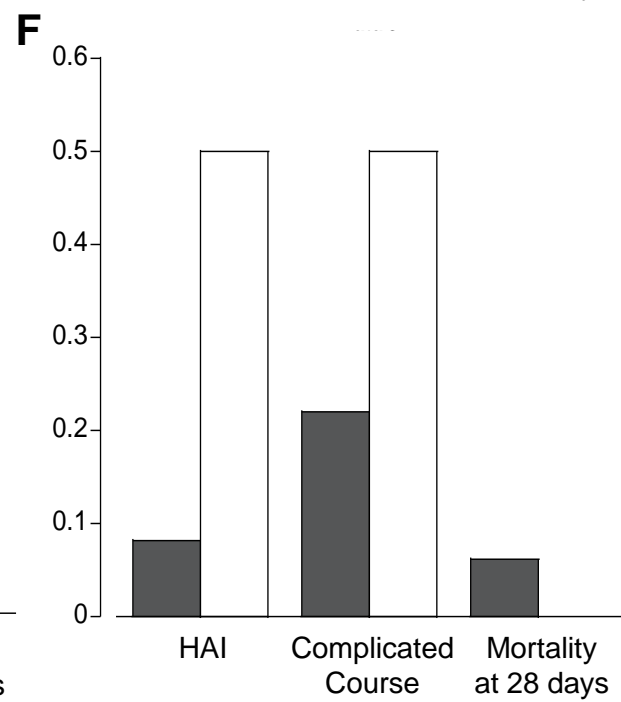

Supplement: NIHMS1592589-supplement-SDC_3.pdf [file NIHMS1592589-supplement-SDC_3.pdf]

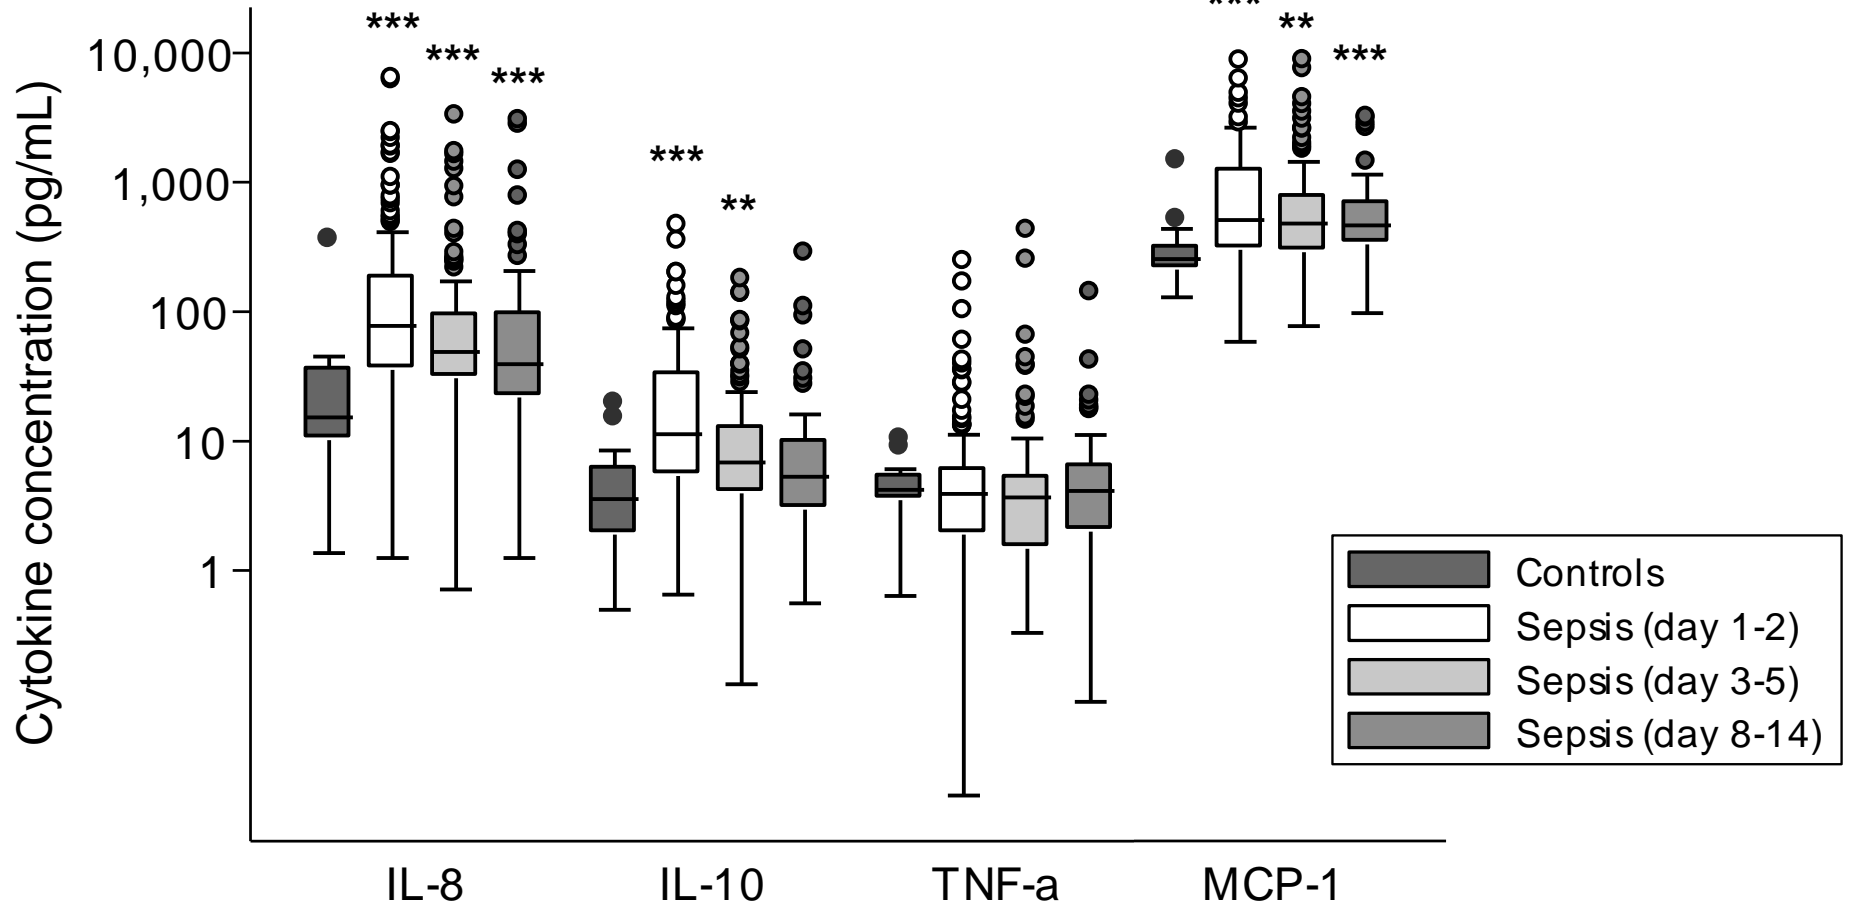

Supplement: NIHMS1592589-supplement-SDC_4.pdf [file NIHMS1592589-supplement-SDC_4.pdf]

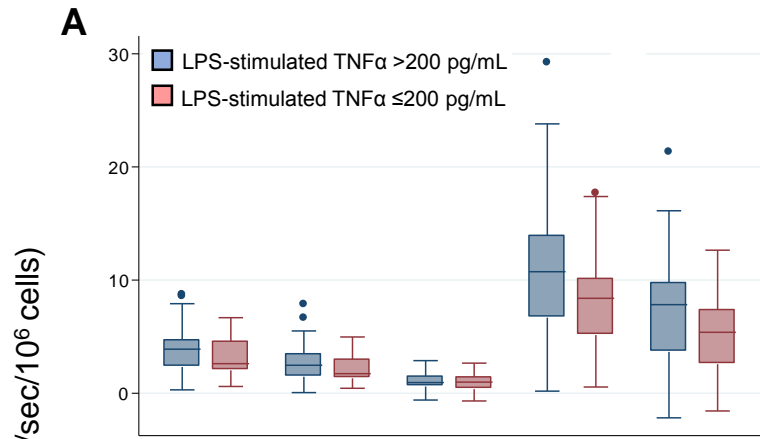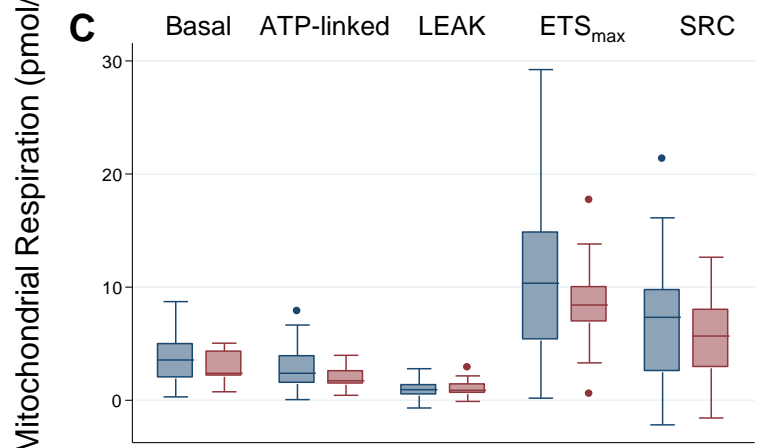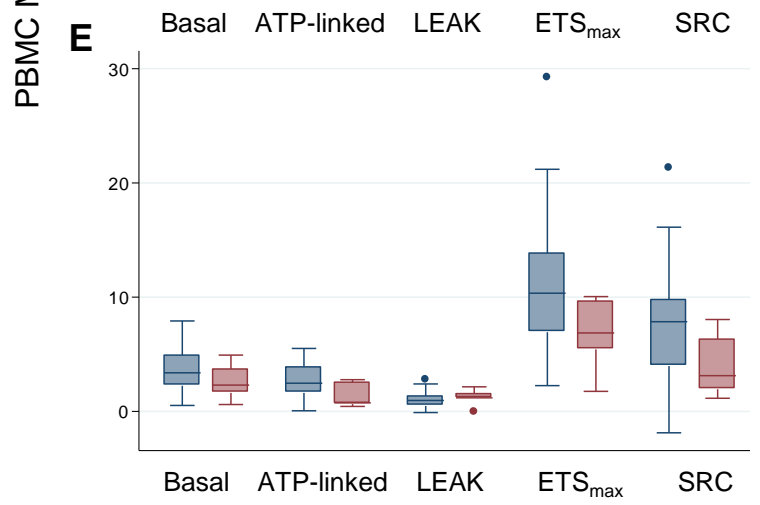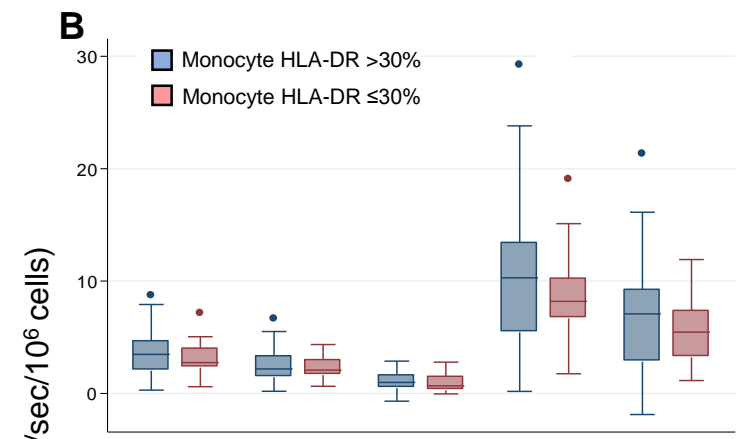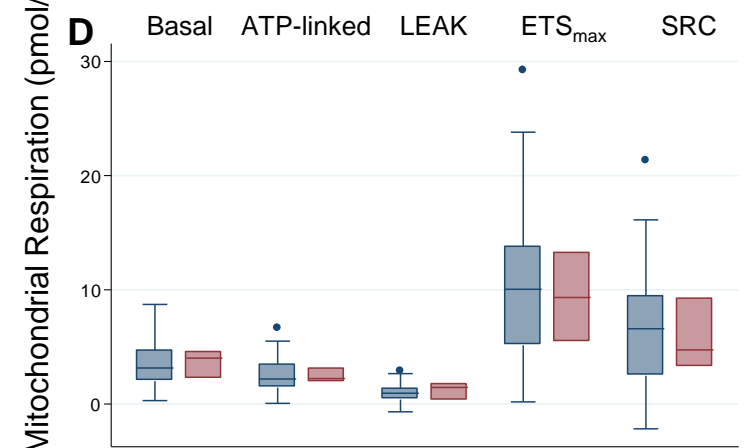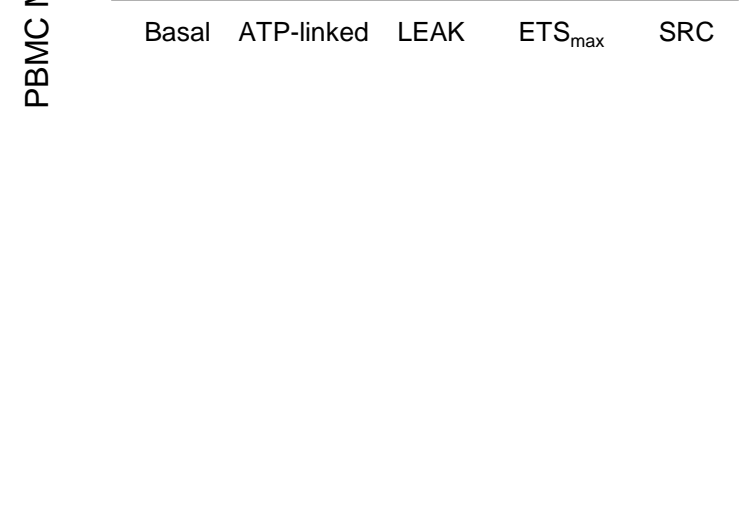

Supplement: NIHMS1592589-supplement-SDC_6.pdf [file NIHMS1592589-supplement-SDC_6.pdf]

SDC 7

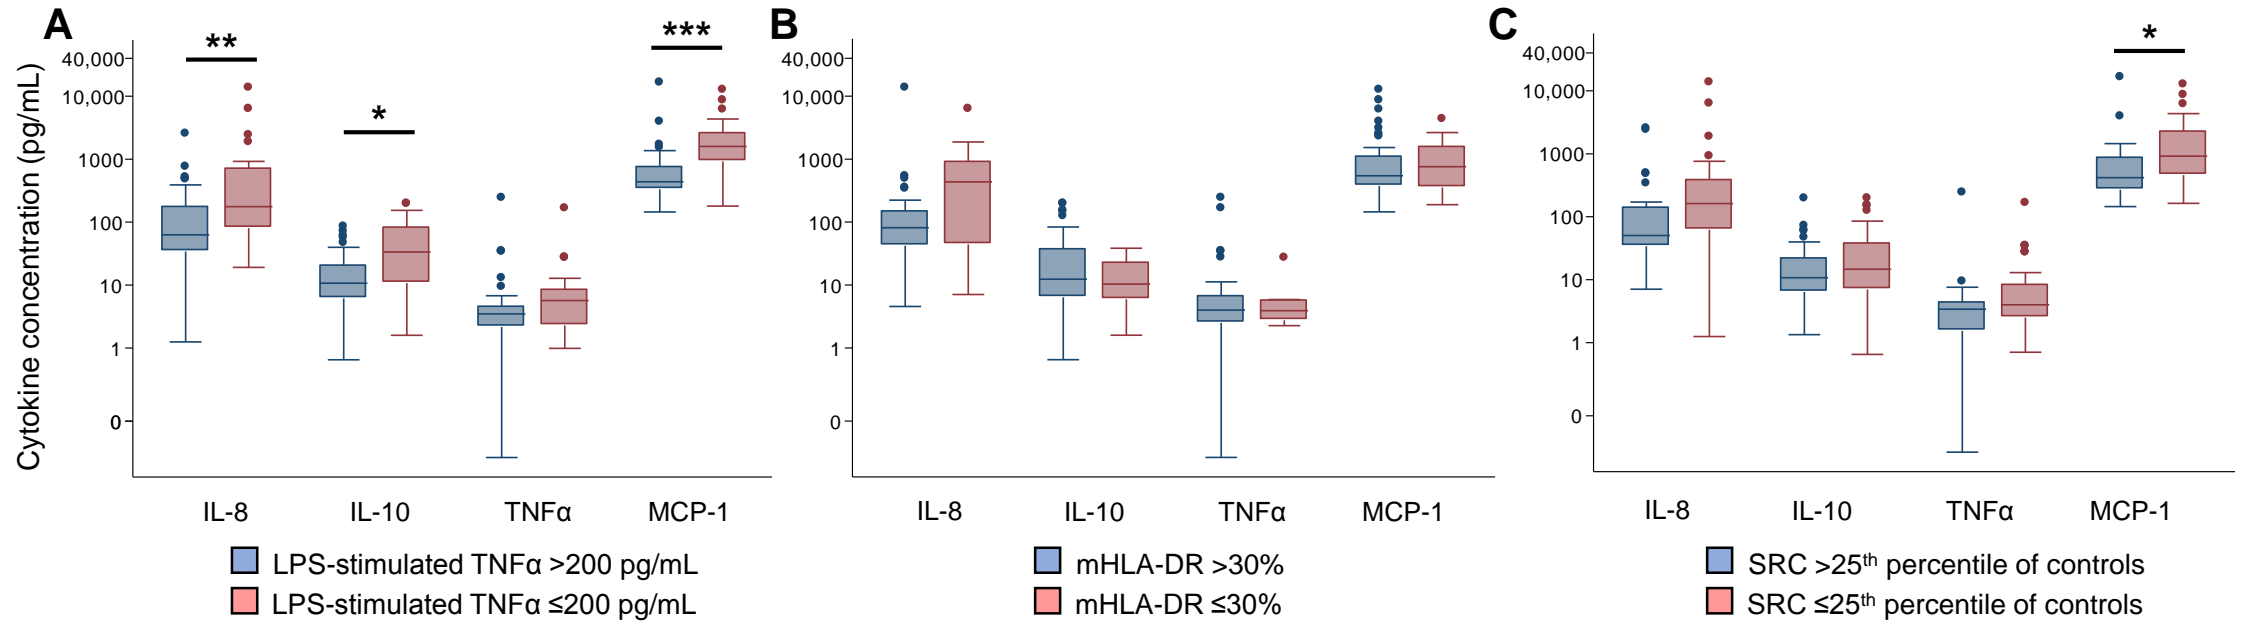

Supplement: NIHMS1592589-supplement-SDC_7.pdf [file NIHMS1592589-supplement-SDC_7.pdf]
